# Supplementary material for: Rift and plume: a discussion on active and passive rifting mechanisms in the Afro-Arabian rift based on synthesis of geophysical data
Source: Copernicus journal article supplement (doi:10.5194/egusphere-2023-2467), 2023-11-06

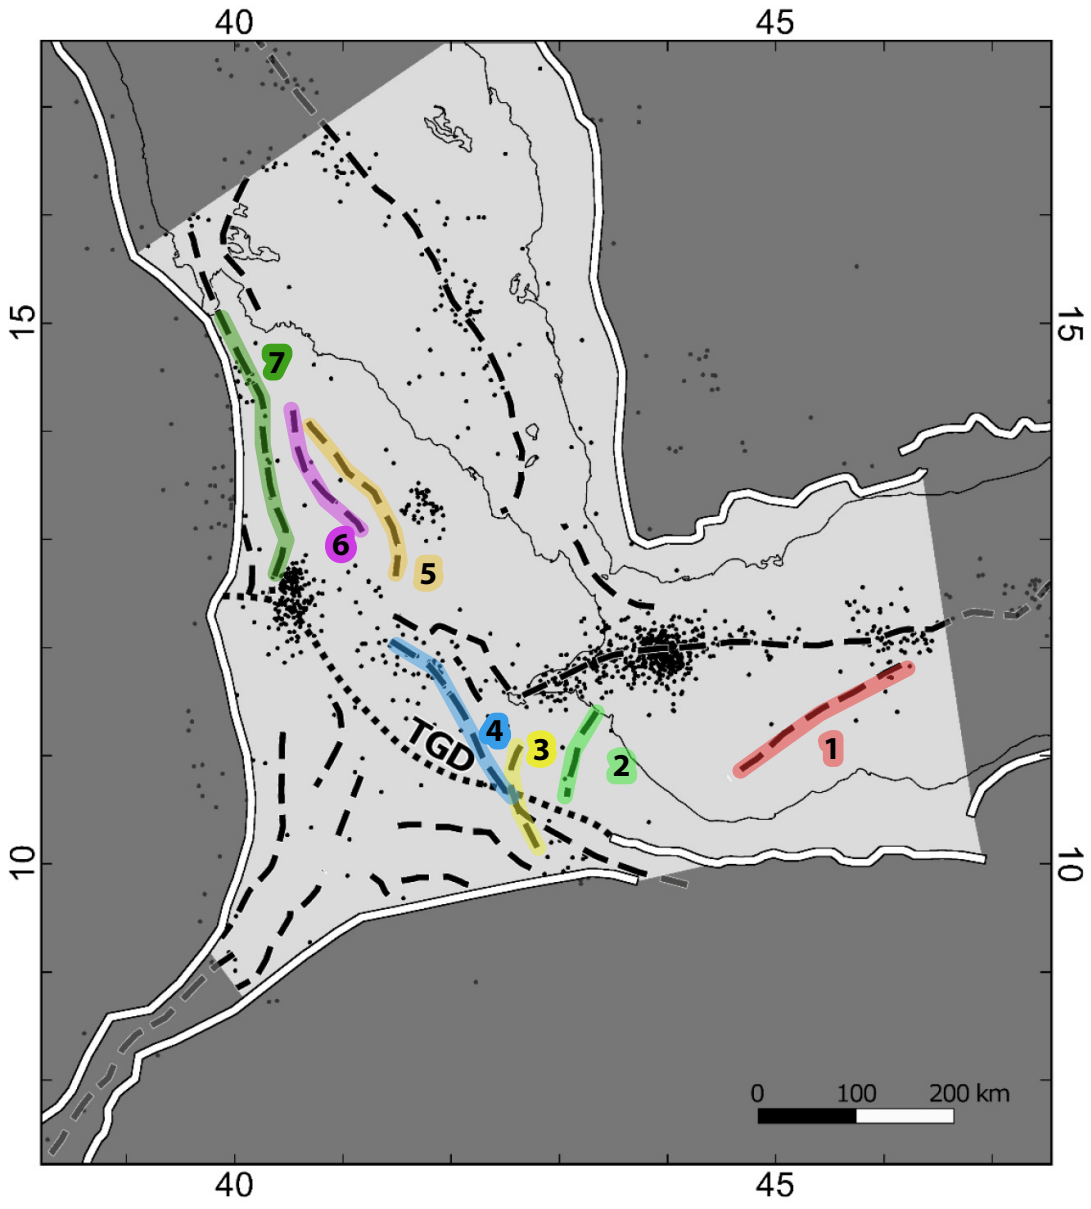

Supplement: Supplementary file [file egusphere-2023-2467-CC1-supplement.pdf]
